# Supplementary material for: Preparation and Application of Degradable Lignin/Poly (Vinyl Alcohol) Polymers as Urea Slow-Release Coating Materials
Source: MDPI journal article supplement (doi:10.3390/molecules29081699), 2024-04-09
Supplement: s1 [file s1]

## Supplementary Materials

### Figures:

**Figure S1.** Base peak ion chromatogram from hydrolysate of yak keratin.

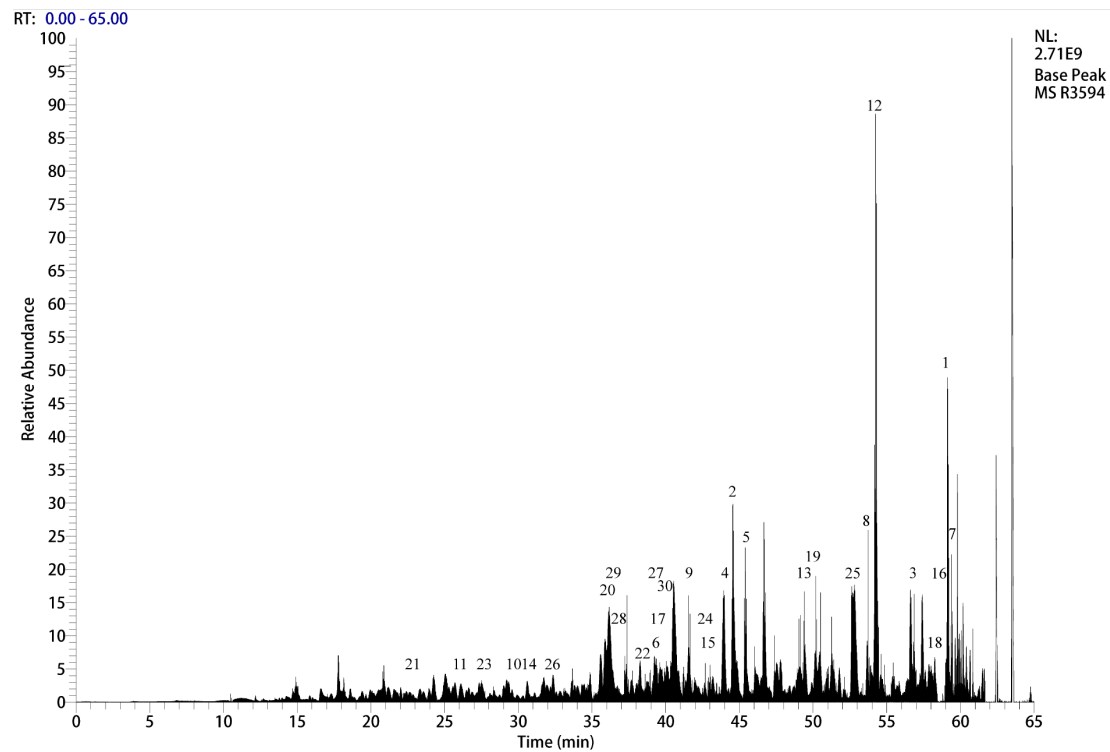

### Highest abundance peptide (FLLD)

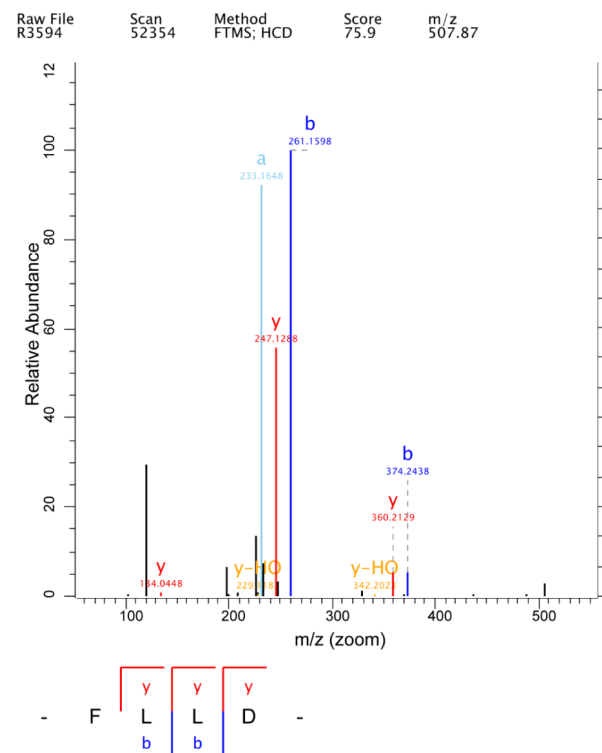

**Tables:****Table S1.** Peptides identified in the purified hydrolysis of the keratin samples.

| No. | Mass      | Charge | Peptide Sequences | Score  | RT(min) |
|-----|-----------|--------|-------------------|--------|---------|
| 1   | 506.27405 | 1      | FLLD              | 75.898 | 59.095  |
| 2   | 359.20564 | 1      | LLD               | 69.294 | 44.538  |
| 3   | 506.27405 | 1      | LFVE              | 51.96  | 57.168  |
| 4   | 416.2271  | 1      | GLLD              | 75.898 | 43.872  |
| 5   | 373.22129 | 1      | LLE               | 83.876 | 45.334  |
| 6   | 359.20564 | 1      | LVE               | 83.876 | 39.785  |
| 7   | 375.21581 | 1      | PLF               | 55.918 | 58.805  |
| 8   | 361.20016 | 1      | FVP               | 25.656 | 53.489  |
| 9   | 416.2271  | 1      | LGEV              | 70.862 | 41.078  |
| 10  | 487.3006  | 1      | VKLE              | 70.863 | 29.299  |
| 11  | 416.2271  | 1      | LEGV              | 31.275 | 25.161  |
| 12  | 416.2271  | 1      | VEGL              | 21.483 | 54.697  |
| 13  | 361.20016 | 1      | VPF               | 27.155 | 49.904  |
| 14  | 518.22241 | 1      | EELE              | 119.89 | 30.603  |
| 15  | 423.20055 | 1      | YLE               | 69.294 | 42.899  |
| 16  | 430.25801 | 1      | WLL               | 41.83  | 59.101  |
| 17  | 529.3224  | 1      | LRLE              | 62.086 | 39.193  |
| 18  | 375.21581 | 1      | FPL               | 55.918 | 58.203  |
| 19  | 361.20016 | 1      | PVF               | 41.83  | 50.213  |
| 20  | 372.27366 | 1      | KLL               | 61.092 | 36.159  |
| 21  | 416.2271  | 1      | EAVV              | 97.748 | 22.844  |
| 22  | 487.3006  | 1      | KVLE              | 90     | 38.078  |
| 23  | 488.24823 | 1      | LEVE              | 77.528 | 27.149  |
| 24  | 377.19507 | 1      | YVP               | 55.918 | 42.577  |
| 25  | 1162.6234 | 2      | EFVALKKDVD        | 187.5  | 53.379  |
| 26  | 529.3224  | 1      | LERL              | 54.668 | 31.815  |
| 27  | 400.2798  | 1      | LRL               | 53.534 | 38.928  |
| 28  | 358.22162 | 1      | GLLG              | 62.263 | 36.153  |
| 29  | 377.19507 | 1      | VPY               | 33.176 | 35.978  |
| 30  | 487.3006  | 1      | LLKD              | 24.3   | 39.475  |

**Table S2.** The reaction condition and N content for the amination of L.

| <b>Grou<br/>p</b> | <b>Lignin<br/>(g)</b> | <b>Glutaraldehyde<br/>(ml)</b> | <b>Keratin<br/>(g)</b> | <b>Temperature<br/>(°C)</b> | <b>Time<br/>(h)</b> | <b>N%</b> |
|-------------------|-----------------------|--------------------------------|------------------------|-----------------------------|---------------------|-----------|
| AL1               | 1                     | 1                              | 2                      | 40                          | 4                   | 2.35      |
| AL2               | 1                     | 1                              | 4                      | 50                          | 5                   | 4.68      |
| AL3               | 1                     | 1                              | 6                      | 60                          | 6                   | 5.14      |
| AL4               | 1                     | 2                              | 2                      | 50                          | 6                   | 4.16      |
| AL5               | 1                     | 2                              | 4                      | 60                          | 4                   | 5.22      |
| AL6               | 1                     | 2                              | 6                      | 40                          | 5                   | 6.17      |
| AL7               | 1                     | 3                              | 2                      | 60                          | 5                   | 3.78      |
| AL8               | 1                     | 3                              | 4                      | 40                          | 6                   | 5.17      |
| AL9               | 1                     | 3                              | 6                      | 50                          | 4                   | 6.78      |
| K1                |                       | 12.17                          | 10.29                  | 13.69                       | 14.35               |           |
| K2                |                       | 15.55                          | 15.07                  | 15.62                       | 14.63               |           |
| K3                |                       | 15.73                          | 18.09                  | 14.14                       | 14.47               |           |
| k1                |                       | 4.057                          | 3.430                  | 4.563                       | 4.783               |           |
| k2                |                       | 5.183                          | 5.023                  | 5.207                       | 4.877               |           |
| k3                |                       | 5.243                          | 6.030                  | 4.713                       | 4.823               |           |
| R                 |                       | 1.187                          | 2.600                  | 0.643                       | 0.0933              |           |
| Priority          | B3>A3>C2>D2           |                                |                        |                             |                     |           |
